# Supplementary material for: Use of ITS2 Region as the Universal DNA Barcode for Plants and Animals
Source: PLoS One. 2010 Oct 1;5(10):e13102. doi: 10.1371/journal.pone.0013102 (PMC2948509; doi:10.1371/journal.pone.0013102)
Supplement: Table S2 — Success rates of using ITS2 sequences to identify dicotyledon, moss, and gymnosperm species in families having less than 10 genera and monocotyledon species in families having less than 5 genera. (0.05 MB XLS) [file pone.0013102.s002.xls]

## Sheet: Dicotyledons
Family name	No. of genera	No. of species	No. of samples	Success rate at the genus level (%)	Success rate at the species level (%)
Phyllanthaceae	9	152	218	99.1	89.9
Rhamnaceae	9	141	183	100	69.9
Santalaceae	9	109	144	100	76.4
Meliaceae	9	62	84	100	86.9
Verbenaceae	8	71	115	100	93
Convolvulaceae	7	220	498	99.6	67.3
Polemoniaceae	7	143	289	99.3	75.1
Clusiaceae	7	134	256	100	87.5
Thymelaeaceae	7	66	151	100	90.1
Rutaceae	7	62	231	100	61.9
Hydrophyllaceae	7	47	59	100	96.6
Lythraceae	7	43	68	100	97.1
Fagaceae	6	137	483	100	78.9
Myrsinaceae	6	116	166	100	93.4
Oleaceae	6	84	181	99.4	79
Betulaceae	6	76	224	100	55.8
Combretaceae	6	63	75	100	89.3
Anacardiaceae	6	57	110	100	75.5
Juglandaceae	6	39	117	100	75.2
Hamamelidaceae	6	24	50	100	80
Rhizophoraceae	6	22	103	100	73.8
Onagraceae	5	68	86	100	70.9
Styracaceae	5	52	64	100	84.4
Saxifragaceae	5	38	179	99.4	74.9
Malpighiaceae	5	23	51	100	96.1
Penaeaceae	5	17	21	76.2	52.4
Aizoaceae	5	15	27	48.1	48.1
Primulaceae	4	110	519	100	64.9
Urticaceae	4	89	129	96.9	95.3
Cactaceae	4	52	185	100	55.7
Zygophyllaceae	4	35	44	100	95.5
Portulacaceae	4	31	34	100	88.2
Pittosporaceae	4	31	32	100	84.4
Buxaceae	4	23	24	100	91.7
Stylidiaceae	4	15	15	100	86.7
Memecylaceae	4	14	14	100	100
Papaveraceae	4	12	18	100	100
Moraceae	3	188	240	100	81.7
Oxalidaceae	3	180	205	100	81
Passifloraceae	3	114	142	98.6	90.8
Geraniaceae	3	80	104	100	91.3
Burseraceae	3	57	117	100	97.4
Ulmaceae	3	15	83	100	75.9
Podostemaceae	3	13	22	100	100
Dipsacaceae	3	10	10	100	100
Chrysobalanaceae	3	9	14	100	35.7
Phrymaceae	3	6	19	100	100
Berberidaceae	2	117	190	100	50.5
Caprifoliaceae	2	61	104	100	79.8
Violaceae	2	53	189	100	73.5
Goodeniaceae	2	49	74	100	73
Tropaeolaceae	2	45	85	100	68.2
Salicaceae	2	36	56	100	42.9
Theaceae	2	34	61	100	70.5
Turneraceae	2	34	44	100	88.6
Menyanthaceae	2	29	54	100	85.2
Lentibulariaceae	2	28	37	100	89.2
Adoxaceae	2	19	35	100	91.4
Rafflesiaceae	2	18	18	100	38.9
Myricaceae	2	16	30	100	66.7
Plumbaginaceae	2	13	124	100	77.4
Loranthaceae	2	12	22	100	90.9
Elaeagnaceae	2	10	15	100	100
Ternstroemiaceae	2	7	7	100	57.1
Stilbaceae	2	5	5	100	80
Begoniaceae	1	124	236	100	97.9
Balsaminaceae	1	117	137	100	97.8
Calceolariaceae	1	99	103	100	74.8
Aquifoliaceae	1	58	148	100	94.6
Hypericaceae	1	46	98	100	84.7
Gunneraceae	1	24	27	100	81.5
Paeoniaceae	1	23	35	100	40
Nothofagaceae	1	22	22	100	72.7
Ancistrocladaceae	1	19	48	100	89.6
Ebenaceae	1	17	21	100	100
Krameriaceae	1	16	104	100	100
Clethraceae	1	15	16	100	100
Anisophylleaceae	1	12	12	100	75
Ochnaceae	1	11	11	100	100
Platanaceae	1	10	308	100	39
Sarraceniaceae	1	10	25	100	72
Fouquieriaceae	1	10	16	100	100
Coriariaceae	1	10	15	100	86.7
Boraginaceae	1	8	14	100	57.1
Droseraceae	1	8	9	100	100
Griseliniaceae	1	7	8	100	100
Elaeocarpaceae	1	7	7	100	100
Misodendraceae	1	7	7	100	100
Haloragaceae	1	6	23	100	100
Hydrangeaceae	1	6	20	100	90
Aucubaceae	1	5	20	100	90
Loganiaceae	1	5	18	100	100
Corynocarpaceae	1	5	16	100	100
Alseuosmiaceae	1	5	8	100	0
Altingiaceae	1	5	7	100	71.4
Byblidaceae	1	5	6	100	100
Grossulariaceae	1	5	5	100	100
Malesherbiaceae	1	5	5	100	100
Nitrariaceae	1	5	5	100	100
Oliniaceae	1	5	5	100	60
Diervillaceae	1	4	6	100	100
Stachyuraceae	1	4	6	100	50
Diapensiaceae	1	4	4	100	100
Pennantiaceae	1	4	4	100	100
Molluginaceae	1	3	8	100	100
Cannabaceae	1	3	7	100	100
Argophyllaceae	1	3	4	100	75
Cleomaceae	1	3	4	100	100
Parnassiaceae	1	3	3	100	100
Datiscaceae	1	2	13	100	100
Nelumbonaceae	1	2	13	100	100
Nepenthaceae	1	2	6	100	100
Lardizabalaceae	1	2	5	100	100
Linaceae	1	2	5	80	80
Phytolaccaceae	1	2	5	100	100
Penthoraceae	1	2	3	100	100
Actinidiaceae	1	2	2	100	100
Bignoniaceae	1	2	2	100	0
Calyceraceae	1	2	2	100	100
Casuarinaceae	1	2	2	100	100
Cyrillaceae	1	2	2	100	100
Dilleniaceae	1	2	2	100	100
Helwingiaceae	1	2	2	100	100
Picrodendraceae	1	2	2	100	100
Symplocaceae	1	2	2	100	100

## Sheet: Monocotyledons
Family name	No. of genera	No. of species	No. of samples	Success rate at the genus level (%)	Success rate at the species level (%)
Alliaceae	3	277	722	100	72.9
Juncaceae	3	89	109	100	60.6
Asphodelaceae	3	82	129	100	25.6
Burmanniaceae	3	26	33	100	100
Ruscaceae	3	8	8	100	50
Musaceae	2	42	73	100	80.8
Potamogetonaceae	2	37	231	95.2	70.1
Alismataceae	2	12	15	100	66.7
Tofieldiaceae	2	11	26	100	100
Costaceae	1	50	94	100	52.1
Aponogetonaceae	1	18	39	100	82.1
Lowiaceae	1	13	17	100	64.7
Bromeliaceae	1	10	10	100	80
Asparagaceae	1	9	9	100	100
Smilacaceae	1	8	26	100	100
Alstroemeriaceae	1	8	8	100	87.5
Acoraceae	1	7	12	100	100
Dioscoreaceae	1	5	9	77.8	77.8
Heliconiaceae	1	4	4	100	75
Eriocaulaceae	1	3	3	100	100
Hemerocallidaceae	1	2	6	100	0

## Sheet: Gymnosperms
Family name	No. of genera	No. of species	No. of samples	Success rate at the genus level (%)	Success rate at the species level (%)
Zamiaceae	6	123	177	100	58.2
Pinaceae	5	108	264	100	59.5
Taxaceae	3	18	81	100	84
Cycadaceae	2	16	27	100	74.1
Ephedraceae	1	40	79	100	62
Gnetaceae	1	14	65	100	100
Cephalotaxaceae	1	10	24	100	79.2

## Sheet: Mosses
Family name	No. of genera	No. of species	No. of samples	Success rate at the genus level (%)	Success rate at the species level (%)
Pottiaceae	9	79	133	100	88
Leskeaceae	9	25	50	98	98
Hypnaceae	7	28	61	100	67.2
Mniaceae	6	42	170	100	97.1
Amblystegiaceae	6	39	184	97.8	66.8
Bryaceae	6	30	42	81	81
Lembophyllaceae	6	18	100	90	81
Dicranaceae	5	16	40	100	100
Hylocomiaceae	5	14	33	100	72.7
Polytrichaceae	4	48	52	100	98.1
Geocalycaceae	3	34	47	100	93.6
Meteoriaceae	3	15	17	100	100
Pallaviciniaceae	3	10	13	100	100
Calliergonaceae	3	7	344	100	99.4
Leptodontaceae	3	6	7	100	100
Leucobryaceae	2	46	111	100	71.2
Jungermanniaceae	2	18	52	100	100
Fontinalaceae	2	14	38	100	34.2
Anomodontaceae	2	11	15	100	100
Adelanthaceae	2	8	12	100	100
Grimmiaceae	2	5	17	100	100
Leucodontaceae	2	5	6	100	100
Lepidolaenaceae	2	5	5	100	100
Pterobryaceae	2	4	6	100	100
Sphagnaceae	1	161	706	100	30
Plagiochilaceae	1	109	163	100	96.3
Frullaniaceae	1	106	148	100	98
Porellaceae	1	38	90	100	86.7
Herbertaceae	1	10	61	100	100
Jamesoniellaceae	1	7	16	100	100
Thuidiaceae	1	7	10	100	80
Metzgeriaceae	1	6	144	100	100
Echinodiaceae	1	6	7	100	100
Calymperaceae	1	5	19	100	100
Plagiotheciaceae	1	5	6	100	66.7
Aulacomniaceae	1	4	19	100	100
Pterigynandraceae	1	4	8	100	100
Pilotrichaceae	1	4	4	75	75
Aneuraceae	1	3	12	100	100
Theliaceae	1	3	8	100	100
Entodontaceae	1	3	5	100	100
Hymenophytaceae	1	3	5	100	100
Rigodiaceae	1	3	4	100	100
Cyathodiaceae	1	2	20	100	100
Climaciaceae	1	2	3	100	100
Fossombroniaceae	1	2	2	100	100
Hookeriaceae	1	2	2	100	100
Lepyrodontaceae	1	2	2	100	100
Myriniaceae	1	2	2	100	100
Orthotrichaceae	1	2	2	100	100
Radulaceae	1	2	2	100	100
Scapaniaceae	1	2	2	100	100
Sematophyllaceae	1	2	2	100	100
